# Supplementary material
Source: PubMed Central journal article supplement (PMC4959062)
Supplement: AEM.00243-16_zam999117129so1.pdf [file AEM.00243-16_zam999117129so1.pdf]

1 **SUPPLEMENTAL MATERIAL**

2 **DNA extraction.** Fungal biomass (0.3 g wet weight) was placed in a 2-mL screw cap plastic  
3 tube containing approximately 200 mg of 0.5 mm silica and zirconium beads (Fisher Scientific,  
4 USA). Then, 1 mL of Carlson lysis buffer (1) and 1.5  $\mu$ L  $\beta$ -mercaptoethanol (Fisher Scientific,  
5 USA) were added to each tube, followed by two rounds of bead-beating at room temperature for  
6 5 minutes in an Omni bead ruptor 24 (Omni International, Kennesaw, GA) at 5.65 m/s. After  
7 sample incubation at 74 °C for 30 minutes, an initial chloroform:isoamyl alcohol (24:1, [v/v])  
8 wash step was followed by two additional wash steps with 750  $\mu$ L phenol:chloroform:isoamyl  
9 alcohol (25:24:1 [v/v]) before 750  $\mu$ L chloroform:isoamyl alcohol (24:1, [v/v]) was added. The  
10 upper aqueous phase was transferred to a fresh tube, to which 0.6 volumes of ice-cold isopropyl  
11 alcohol was added, followed by cooling at -20 °C for at least 2 hours. Samples were then  
12 centrifuged at 4 °C for 15 minutes at 10,000 x g, the supernatants discarded, and the pellet  
13 washed with ice-cold 70 % ([v/v]) molecular grade ethanol. Following a final centrifugation step  
14 (10,000 x g, 5 minutes), the supernatants were discarded, and the pellets air-dried at room  
15 temperature. The pellets were suspended in 100  $\mu$ L DNase-free H<sub>2</sub>O and stored at -20 °C until  
16 analysis. DNA extraction from soil samples was performed using the FastDNA spin kit for soil  
17 (MP Biomedicals, Santa Ana, CA) following the manufacturer's protocol. DNA concentration  
18 and purity were analyzed with a NanoDrop 2000 spectrophotometer (Thermo Scientific, USA)  
19 and a Qubit 2.0 fluorometer (Life Technologies, Carlsbad, CA) using the dsDNA BR Assay Kit  
20 following manufacturer's recommendations (Life Technologies, Carlsbad, CA).

21

22 **Primer design.** To design primers targeting *p450nor* gene sequences, primary literature  
23 resources were queried to identify available *p450nor* gene and protein sequences. These

24 reference P450nor sequences were assessed using multiple sequence alignment (2) to identify  
25 conserved residues, followed by selection of additional sequences by querying public sequence  
26 databases (GenBank, UniProt) using BLASTx (3). Overall, 38 *p450nor* reference gene sequences  
27 were obtained and aligned using the program T-Coffee (2) followed by manual inspection.  
28 PAL2NAL (4) was used to generate a codon-aware nucleotide alignment to assist in selecting  
29 sites for primer design. In order to design primers specific to fungal *p450nor* sequences and  
30 prevent binding to other genes present within the diverse cytochrome P450 protein family,  
31 features unique to the 38 P450nor reference sequences were identified (5–7). Specifically,  
32 mutations in a secondary structural element of the P450nor protein, referred to as the B helix,  
33 abolished the reducing capacity of the enzyme and implicated specific amino acid residues in  
34 NADH or NADPH co-substrate binding (5). Additionally, the B helix has been proposed as a  
35 unique and variable structural element of the CYP55 family of P450 cytochromes (8); therefore,  
36 an adjacent, conserved site was selected for forward primer binding (*p450nor394F*, Table 1).  
37 Further inspection of the 38 reference protein sequences revealed conserved secondary structural  
38 elements 650-750 nucleotides downstream of the forward priming site suitable for reverse primer  
39 design (Table 1).

40

## 41 REFERENCES

- 42 1. **Carlson JE, Tulsieram LK, Glaubitz JC, Luk VWK, Kauffeldt C, Rutledge R.** 1991.  
43 Segregation of random amplified DNA markers in F1 progeny of conifers. *Theor. Appl.*  
44 *Genet.* **83**:194–200.
- 45 2. **Notredame C, Higgins DG, Heringa J.** 2000. T-coffee: a novel method for fast and  
46 accurate multiple sequence alignment. *J. Mol. Biol.* **302**:205–217.

- 47 3. **Altschul SF, Gish W, Miller W, Myers EW, Lipman DJ.** 1990. Basic local alignment  
48 search tool. *J. Mol. Biol.* **215**:403–410.
- 49 4. **Suyama M, Torrents D, Bork P.** 2006. PAL2NAL: robust conversion of protein  
50 sequence alignments into the corresponding codon alignments. *Nucleic Acids Res.* **34**  
51 :W609–W612.
- 52 5. **Zhang L, Kudo T, Takaya N, Shoun H.** 2002. Distribution, structure and function of  
53 fungal nitric oxide reductase P450nor—recent advances. *Int. Congr. Ser.* **1233**:197–202.
- 54 6. **Oshima R, Fushinobu S, Su F, Zhang L, Takaya N, Shoun H.** 2004. Structural  
55 evidence for direct hydride transfer from NADH to cytochrome P450nor. *J. Mol. Biol.*  
56 **342**:207–217.
- 57 7. **Kudo T, Takaya N, Park S-Y, Shiro Y, Shoun H.** 2001. A positively charged cluster  
58 formed in the heme-distal pocket of cytochrome P450nor is essential for interaction with  
59 NADH. *J. Biol. Chem.* **276**:5020–5026.
- 60 8. **Nelson DR.** 2009. The cytochrome P450 homepage. *Hum. Genomics* **4**:59–65.

61

## 62 **SUPPLEMENTAL FIGURE LEGENDS**

63 **Figure S1.** Stereomicroscopic images of representative members of isolated fungal groups (A)

64 and singletons (B) identified by sequencing of the cloned ITS region from each fungal isolate.

65 The group identifier and putative taxonomic designation are listed in the white boxes to the left

66 of the images. Scale bars and fungal isolate ID number are located in the upper left and lower left

67 corner of each image, respectively.

68

69 **Figure S2.** Alignment of P450<sub>nor</sub> sequences from select organisms displaying primer binding  
70 sites (pink), and key residues involved in cofactor (NAD(P)H) binding and P450<sub>nor</sub> activity. The  
71 N-terminal region of the alignment has been removed for clarity. Stars below the alignment  
72 (blue, red, black) indicate positive, negative and charged amino acids and key residues involved  
73 in NAD(P)H binding, respectively. Sites outlined in black with all bold amino acid characters  
74 indicate 100% amino acid identity. Columns highlighted yellow and outlined in black indicate  $\geq$   
75 80% amino acid similarity. Stars with a white "S" and "H" indicate involvement in a salt bridge  
76 and proton channel, respectively. PP stands for a residue believed to be involved in binding  
77 pyrophosphate on the NAD(P)H molecule. The B' helix (helix 3 $\alpha$  above) is a hypervariable  
78 region of P450 proteins and represents an area of NAD(P)H recognition by P450<sub>nor</sub>. P450<sub>nor</sub>  
79 secondary structure is provided by the PDB accession 1JFB and was added using the ESPript 3.0  
80 web server. F\_oxysorum = *Fusarium oxysporum*, F\_lichenicola = *Fusarium lichenicola*,  
81 C\_globosum = *Chaetomium globosum*, T\_virens = *Trichoderma virens*, S\_macrospora =  
82 *Sordaria macrospora*, G\_graminis = *Gaeumannomyces graminis*, A\_terreus = *Aspergillus*  
83 *terreus* NRRL 255, A\_flavus = *Aspergillus flavus* NRRL 3357, U\_reesii = *Uncinocarpus reesii*,  
84 C\_apollinis = *Coniosporium apollinis*, M\_gypseum = *Microsporium gypseum*, M\_brunnea =  
85 *Marssonina brunnea*, M\_phaseolina = *Macrophomina phaseolina*, T\_cutaneum = *Trichosporon*  
86 *cutaneum*, C\_reinhardtii = *Chlamydomonas reinhardtii*, C\_variabilis = *Chlorella variabilis*.  
87

88 **Figure S3.** N<sub>2</sub>O production in soil microcosms amended with chloramphenicol and streptomycin  
89 to inhibit bacterial activity. NO<sub>3</sub><sup>-</sup> (2 mM) or NO<sub>2</sub><sup>-</sup> (1 mM) were added as the sole nitrogen  
90 source. Acetate (●), formate (□), pyruvate (▲), or plant residue (◇, dashed line), were added as  
91 carbon source and electron donor for NO<sub>3</sub><sup>-</sup> or NO<sub>2</sub><sup>-</sup> reduction, respectively, in Havana (left

92 column) or Urbana (right column) microcosms. Note the use of different scales on the y-axes.  
93 Carbon sources were not monitored during the enrichment.

94

95 **Figure S4.**  $\text{NO}_3^-$  ( $\blacktriangle$ ),  $\text{NO}_2^-$  ( $\blacksquare$ ), and  $\text{N}_2\text{O}$  ( $\circ$ ) dynamics in transfer cultures from Havana and  
96 Urbana microcosms amended with ampicillin and kanamycin to prevent bacterial activity.  $\text{NO}_3^-$   
97 (2 mM) or  $\text{NO}_2^-$  (1 mM) were provided as the sole nitrogen source. Acetate (A, B, C, D), formate  
98 (E, F, G, H), plant residue (I, J, K, L), or pyruvate (M, N, O, P) were added as carbon source and  
99 electron donor. Note the differences in scale on the y-axes.

100

101 **Figure S5.** Intron structure of the region amplified by *p450nor* primer set  
102 *p450nor394F/p450nor809R* in 47 *p450nor* sequences. Only one to four introns are detected in  
103 the amplified region. Thick black lines indicate the gene, and black rectangles above this line  
104 indicate the coding sequences (CDS). Thin lines between CDS rectangles indicate an intron.  
105 Green triangles indicate *p450nor394F/p450nor809R* binding sites. Some genes have been  
106 reversed for clarity (indicated by red REV next to sequence name).

107

## 108 SUPPLEMENTAL DATASET LEGENDS

109 **Dataset S1.** NCBI protein GI and Accession numbers of P450nor sequences used for primer  
110 design.

111 **Dataset S2.** Accessory metadata for the fungal isolates from Havana and Urbana soils.

112 **Dataset S3.** The SILVA 18S rRNA gene classification of 37 fungal isolates in Figure 1.

113 **Dataset S4.** *p450nor* amplicon lengths and number of introns in amplified region using primer  
114 set *p450nor394F/p450nor809R*.

**A**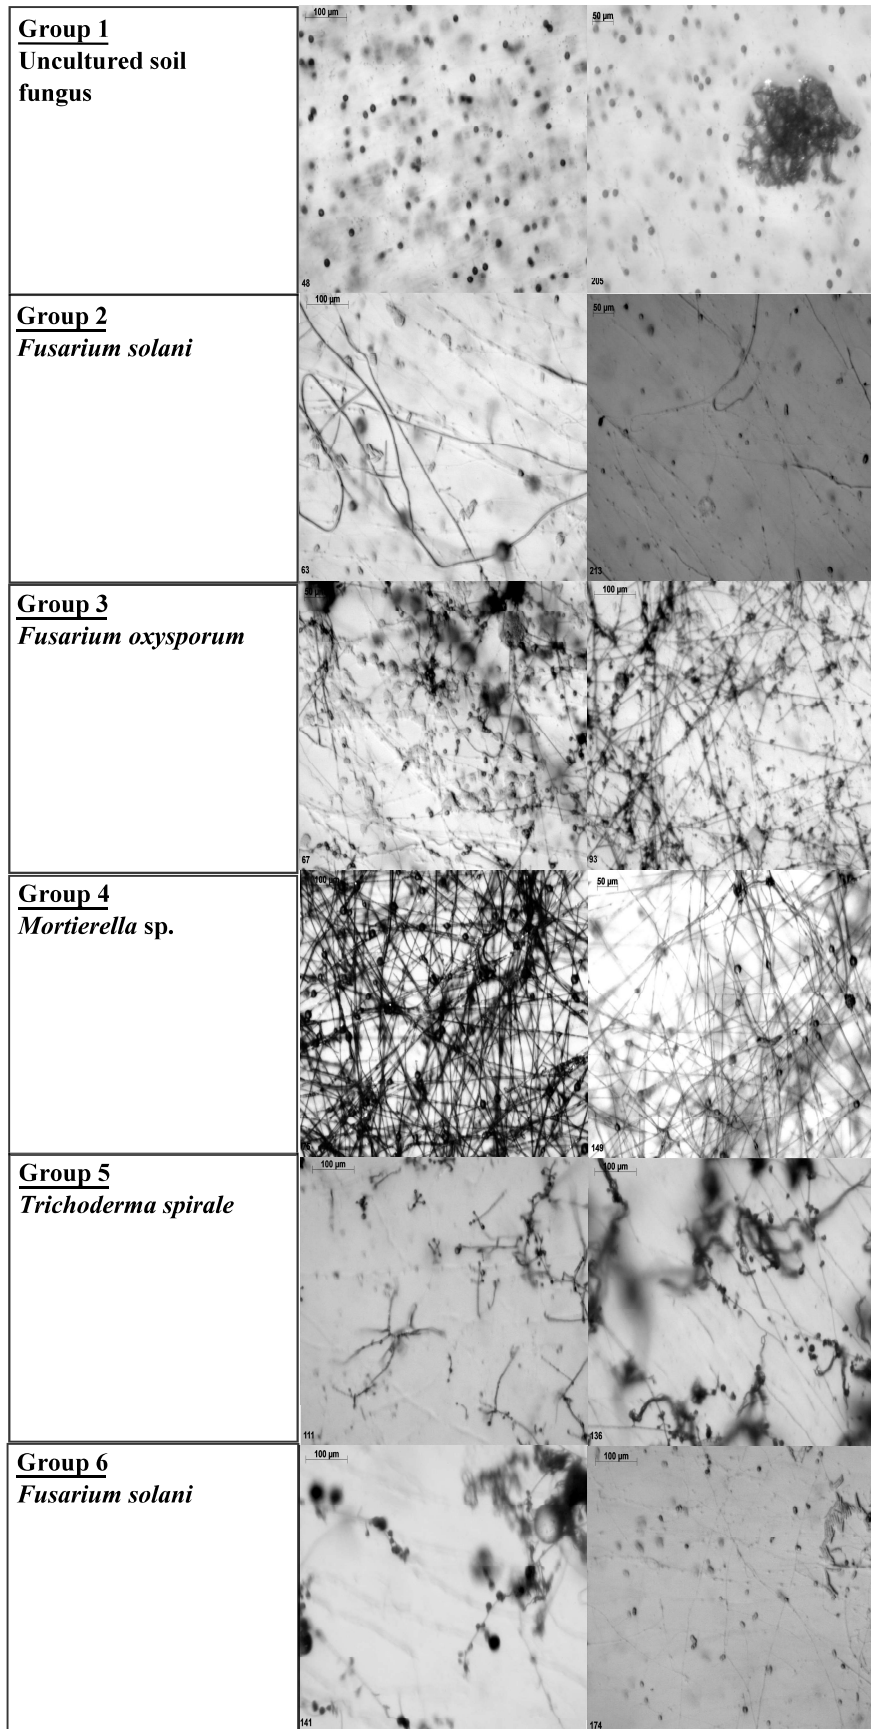**B**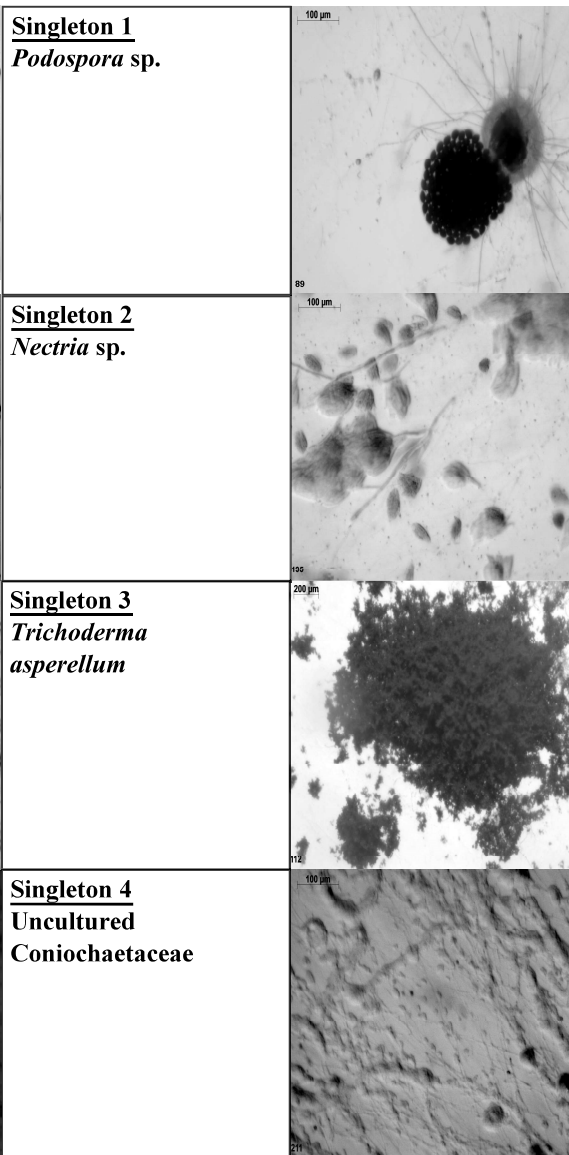

**Figure S1.** Stereomicroscopic images of representative members of isolated fungal groups (A) and singletons (B) identified by sequencing of the cloned ITS region from each fungal isolate. The group identifier and putative taxonomic designation are listed in the white boxes to the left of the images. Scale bars and fungal isolate ID number are located in the upper left and lower left corner of each image, respectively.







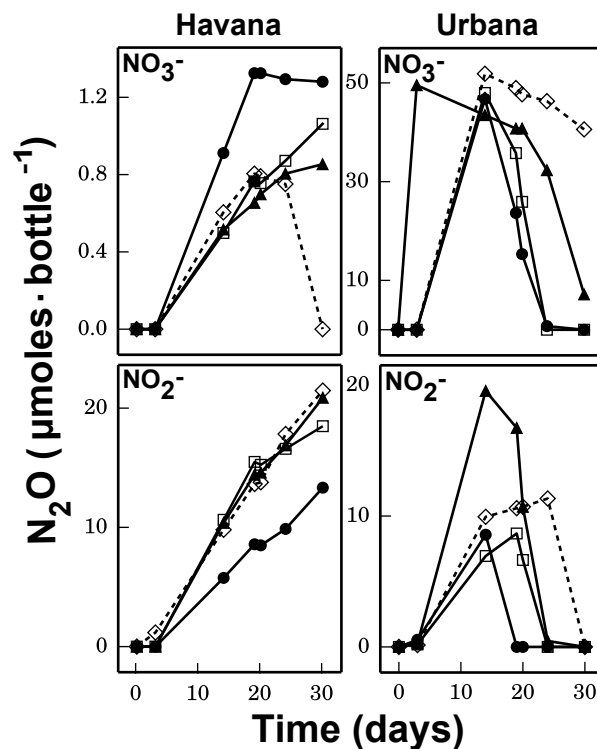

**Figure S3.**  $N_2O$  production in soil microcosms amended with chloramphenicol and streptomycin to inhibit bacterial activity.  $NO_3^-$  (2 mM) or  $NO_2^-$  (1 mM) were added as the sole nitrogen source. Acetate (●), formate (□), pyruvate (▲), or plant residue (◇, dashed line) were added as carbon source and electron donor for  $NO_3^-$  or  $NO_2^-$  reduction, respectively, in Havana (left column) or Urbana (right column) microcosms. Note the use of different scales on the y-axes. Carbon sources were not monitored during the enrichment.

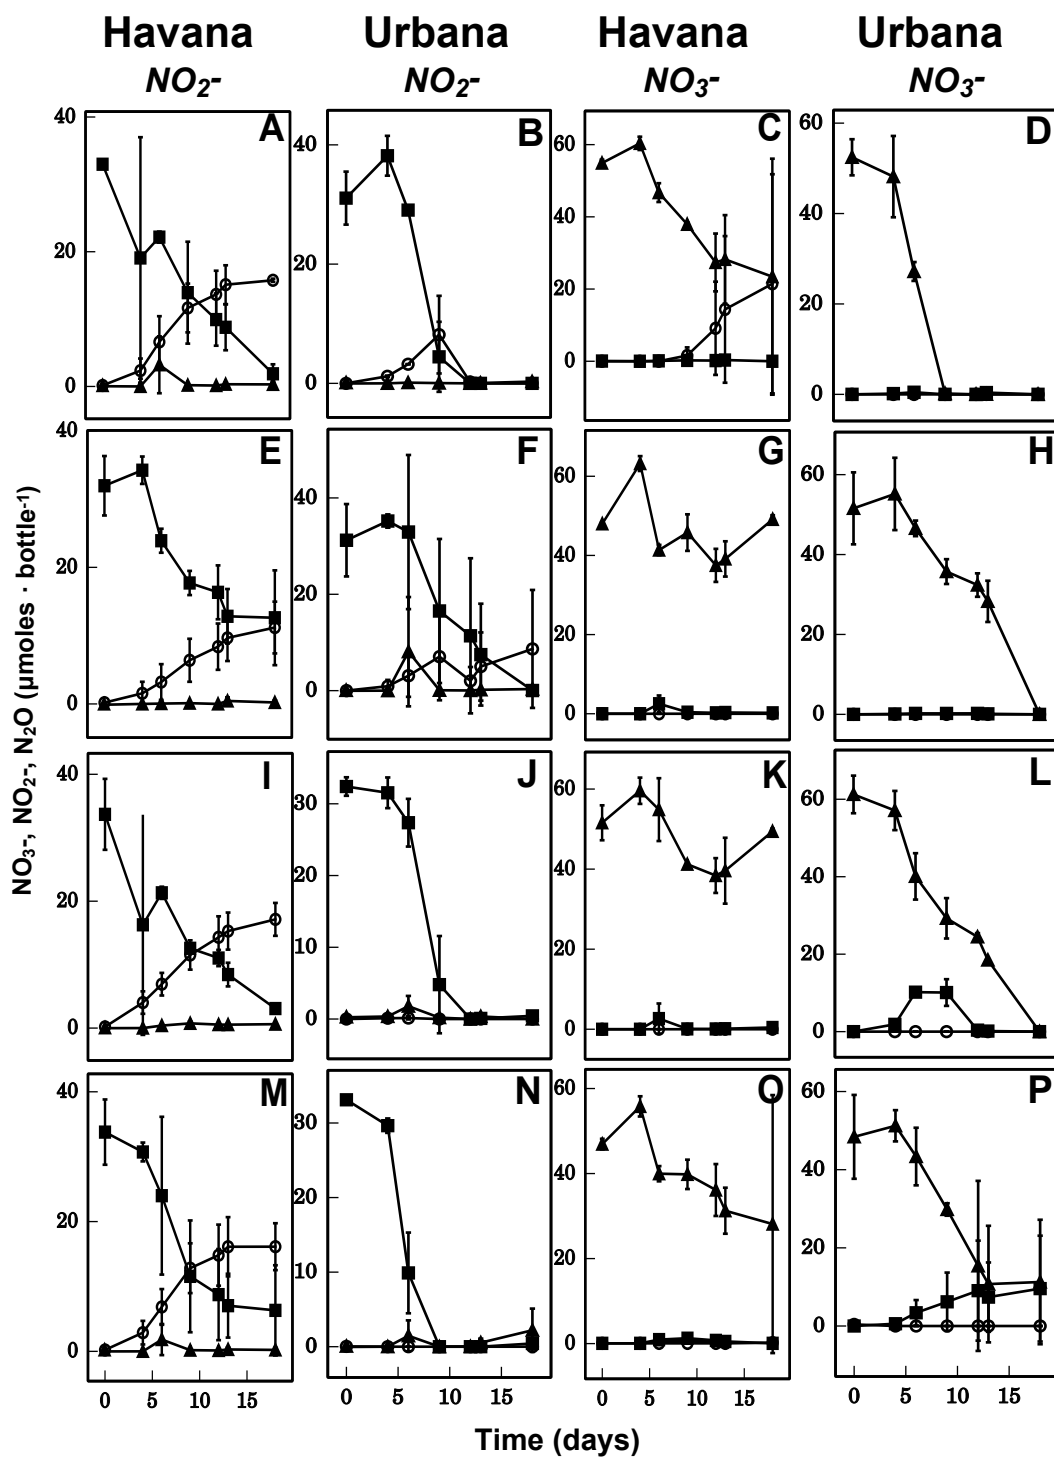

**Figure S4.**  $\text{NO}_3^-$  ( $\blacktriangle$ ),  $\text{NO}_2^-$  ( $\blacksquare$ ), and  $\text{N}_2\text{O}$  ( $\circ$ ) dynamics in transfer cultures from Havana and Urbana microcosms amended with ampicillin and kanamycin to prevent bacterial activity.  $\text{NO}_2^-$  (1 mM) or  $\text{NO}_3^-$  (2 mM) were provided as the sole nitrogen source. Acetate (A, B, C, D), formate (E, F, G, H), plant residue (I, J, K, L), or pyruvate (M, N, O, P) were added as carbon and electron donor source. Note the differences in scale on the y-axes.

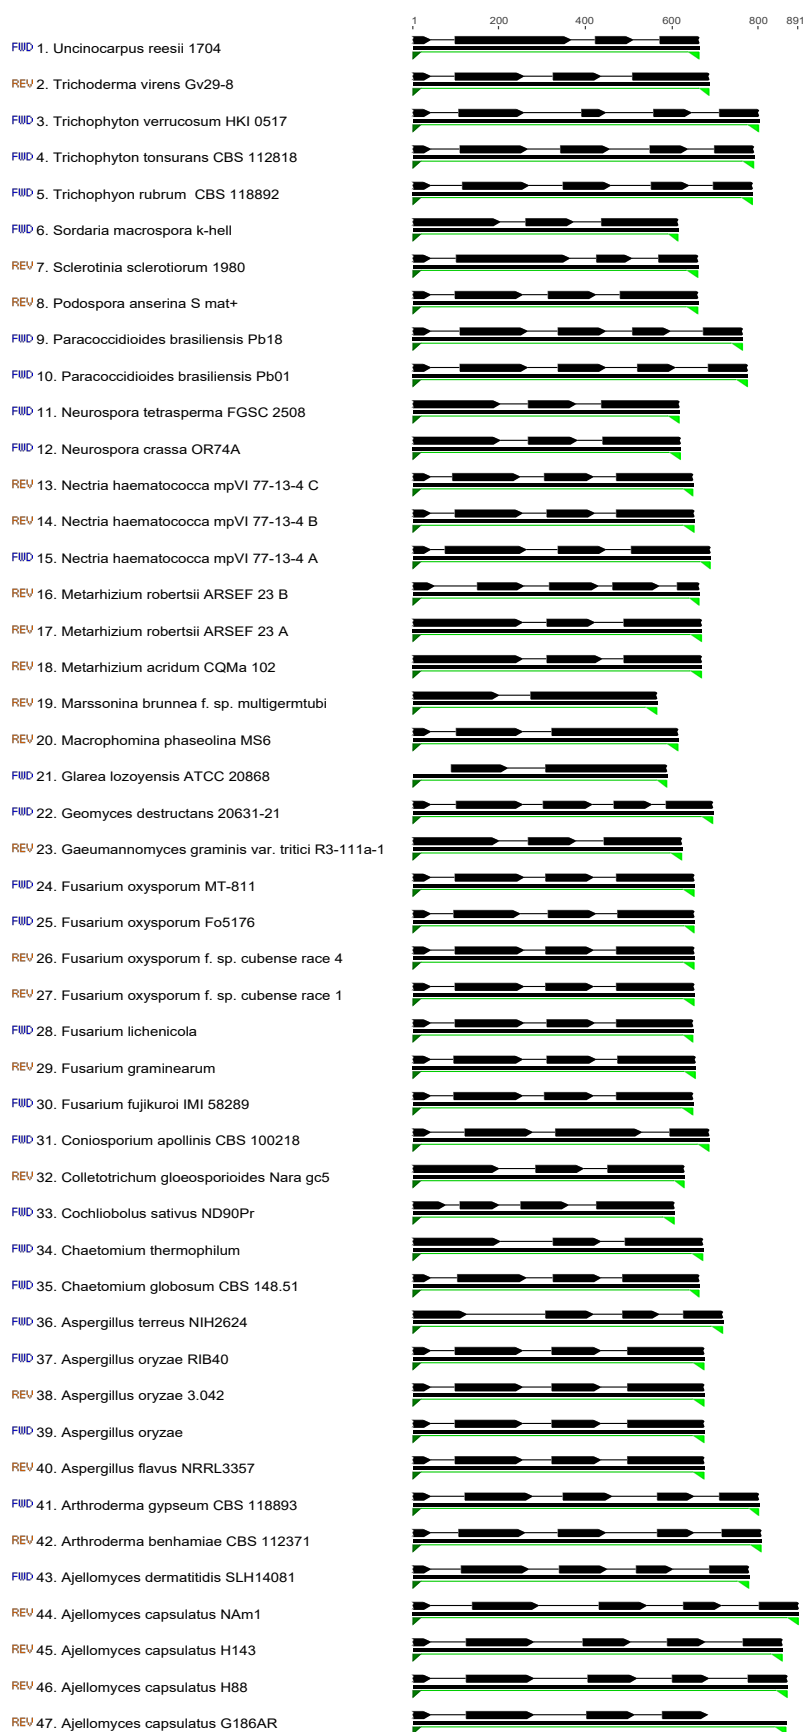

**Figure S5.** Intron structure of the region amplified by *p450nor* primer set *p450nor394F/p450nor809R* in 47 *p450nor* sequences. Only one to four introns are detected in the amplified region. Thick black lines indicate the gene, and black rectangles above this line indicate the coding sequences (CDS). Thin lines between CDS rectangles indicate an intron. Green triangles indicate *p450nor394F/p450nor809R* binding sites. Some genes have been reversed for clarity (indicated by red REV next to sequence name).
